# Supplementary material
Source: publisher figshare collection journal article supplement (https://acs.figshare.com/ndownloader/files/4401448)

# A Pd-Catalyzed Cross-Coupling of Cyclopropylmagnesium Bromide with Aryl Bromides/Triflates Mediated by Substoichiometric Zinc Halide Additives.

Chutian Shu, Kanwar Sidhu, Li Zhang, Xiao-jun Wang,\* Dhileep Krishnamurthy, and Chris H. Senanayake

*Department of Chemical Development, Boehringer Ingelheim Pharmaceuticals, Inc., 900 Ridgebury Road, Ridgefield, CT 06877. email: cshu@rdg.boehringer-ingelheim.com*

## Supporting Information

| Table of Contents.....                                                               | Page   |
|--------------------------------------------------------------------------------------|--------|
| General Information for Materials and Methods.....                                   | S1-S1  |
| <sup>1</sup> H and <sup>13</sup> C NMR Spectra of<br>Compounds 3a-j, 5a, 5d-5g ..... | S2-S18 |

### Materials and Methods.

All reactions, unless specified otherwise, were performed in oven-dried glassware under nitrogen atmosphere. All reagents and solvents were purchased from commercial sources and used as received, unless otherwise indicated. Thin layer chromatography was conducted with E. Merck silica gel 60 F-254 glass-backed plates of 0.25-mm thickness and visualized with UV light or stained with phosphomolybdic acid (5% in EtOH). <sup>1</sup>H and <sup>13</sup>C NMR spectra were recorded on Bruker (400 or 500 MHz for <sup>1</sup>H, 100 or 125 MHz for <sup>13</sup>C) spectrometers in *d*-chloroform (CDCl<sub>3</sub>) or *d*-DMSO ((CD<sub>3</sub>)<sub>2</sub>SO) with chloroform or DMSO as an internal reference, unless otherwise stated.

## NMR Spetra

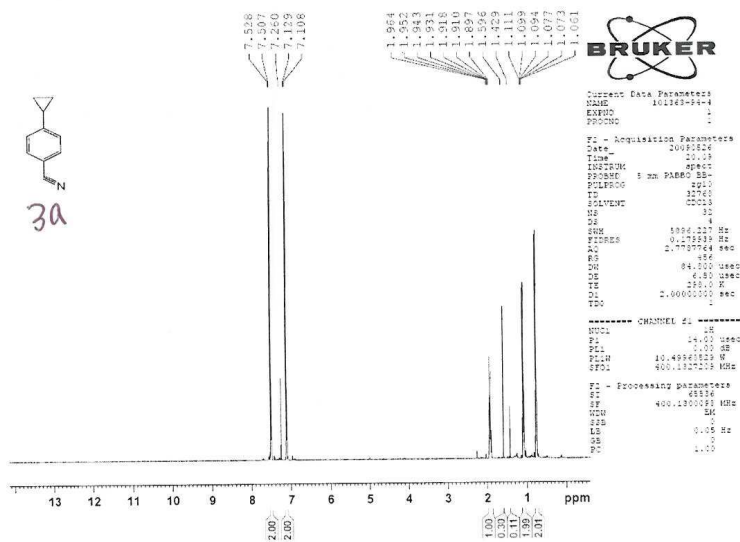

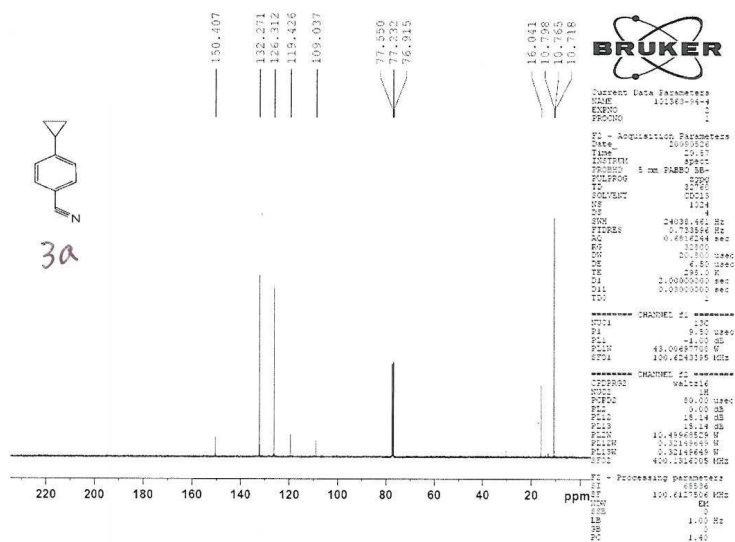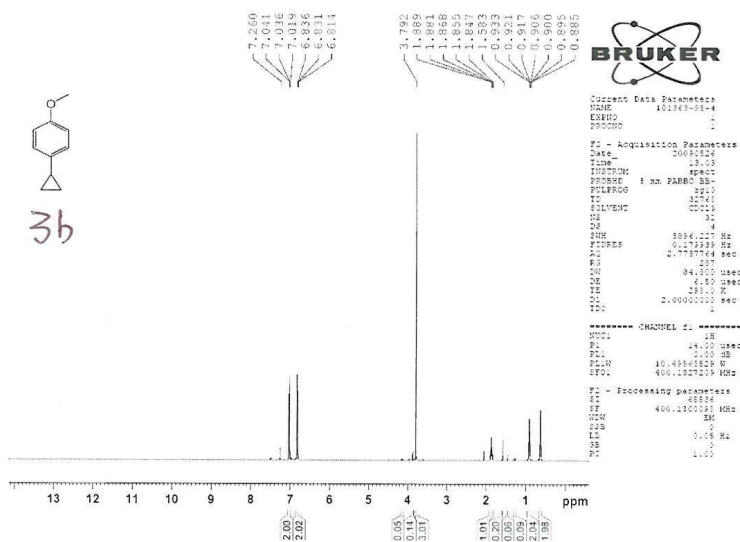

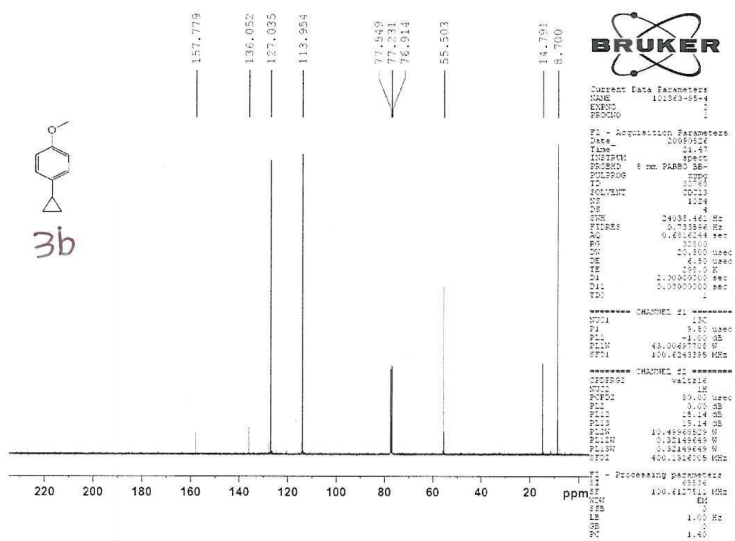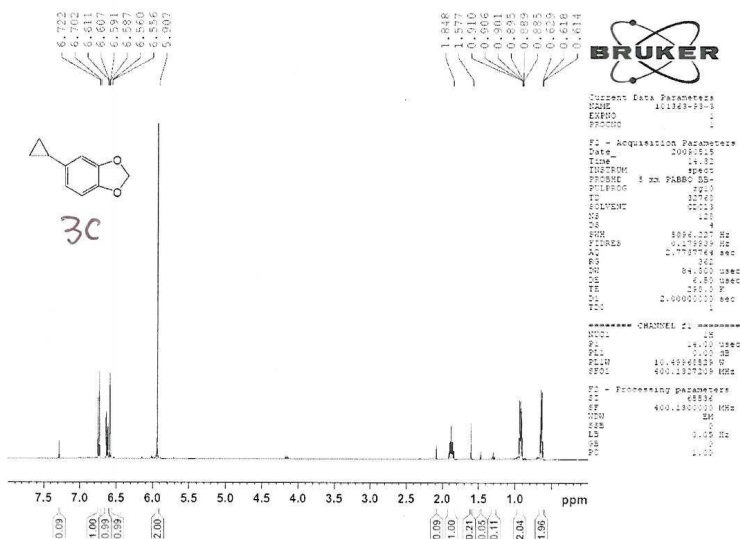

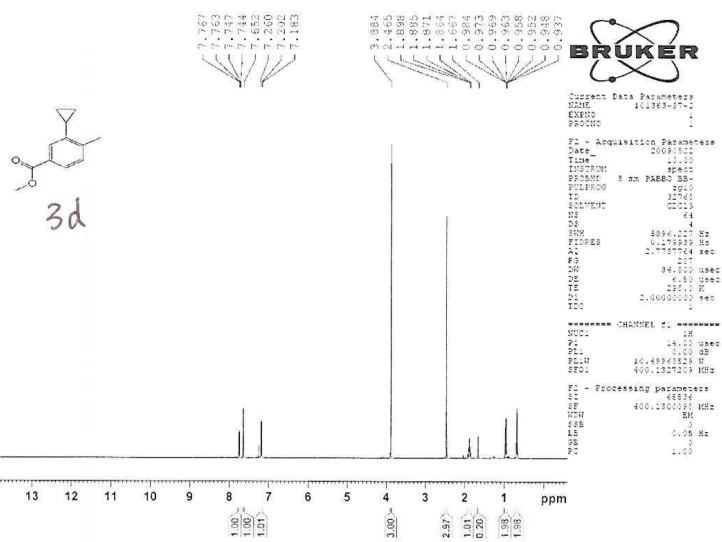

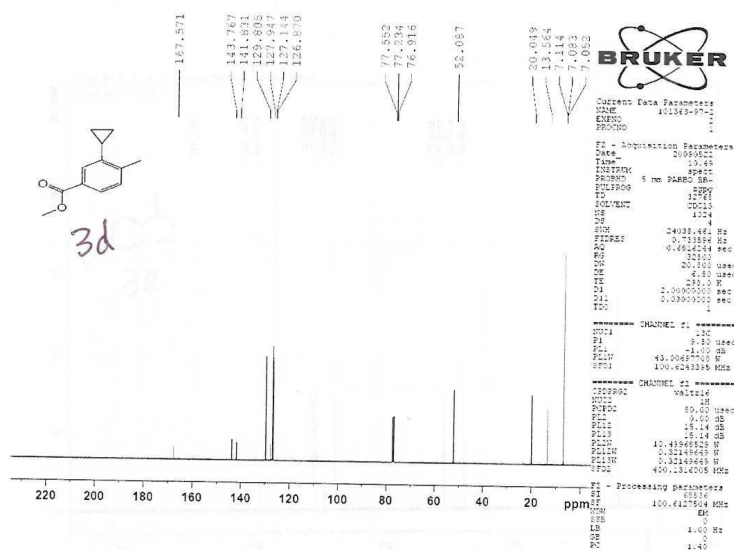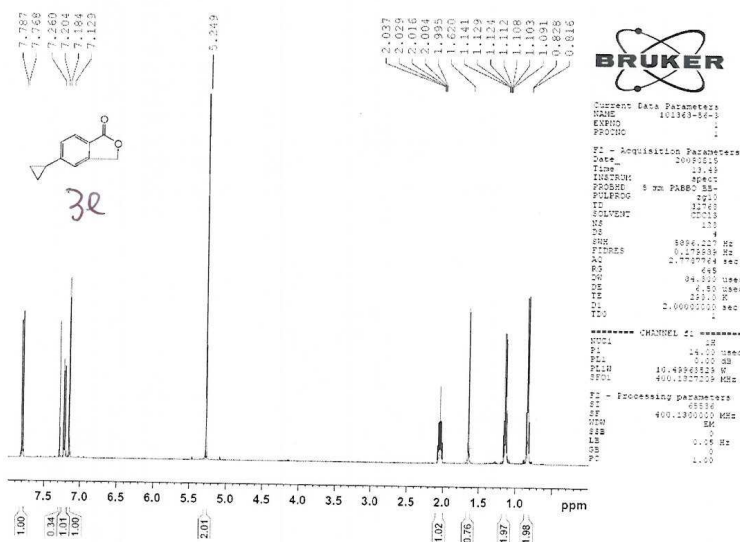

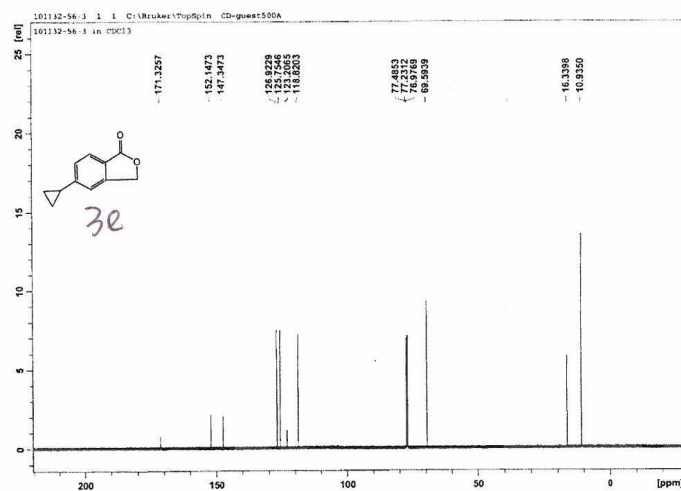

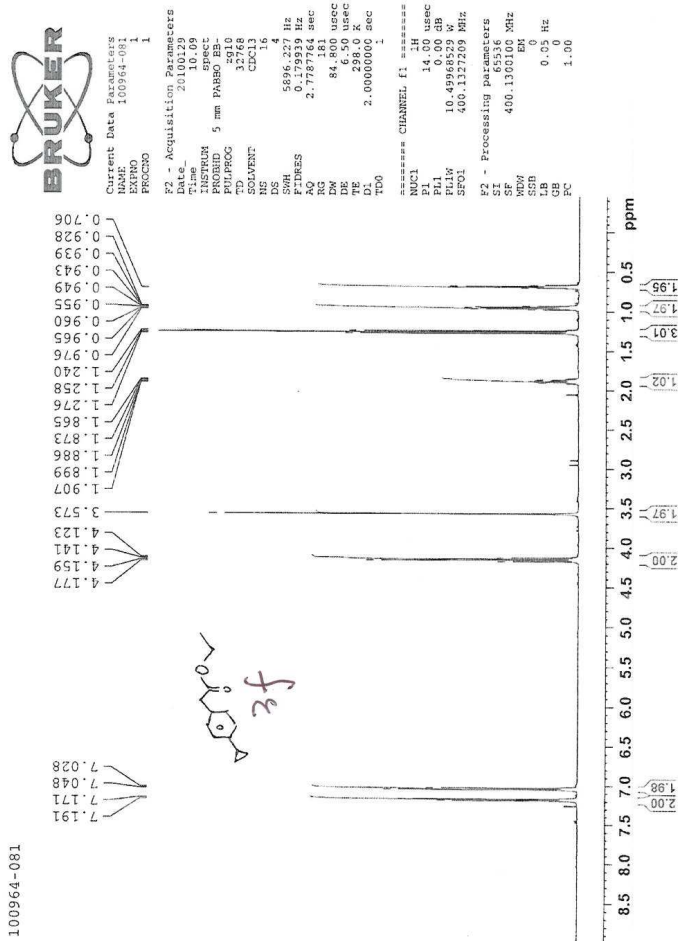



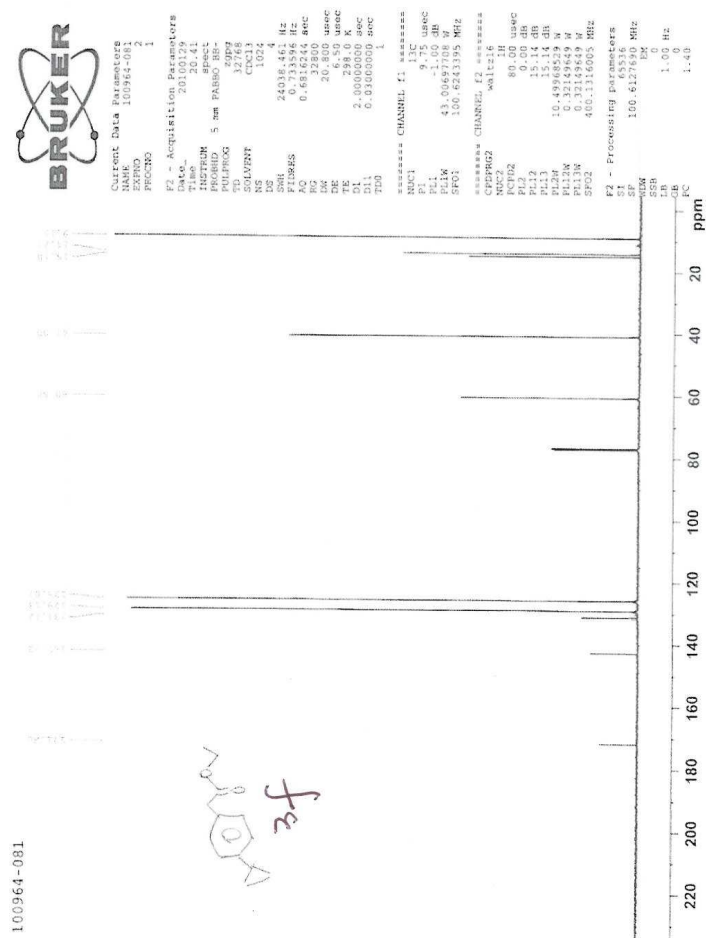

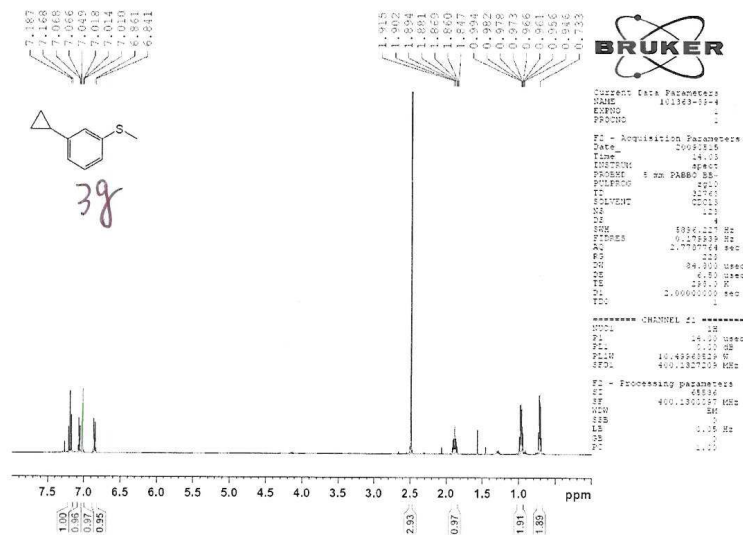

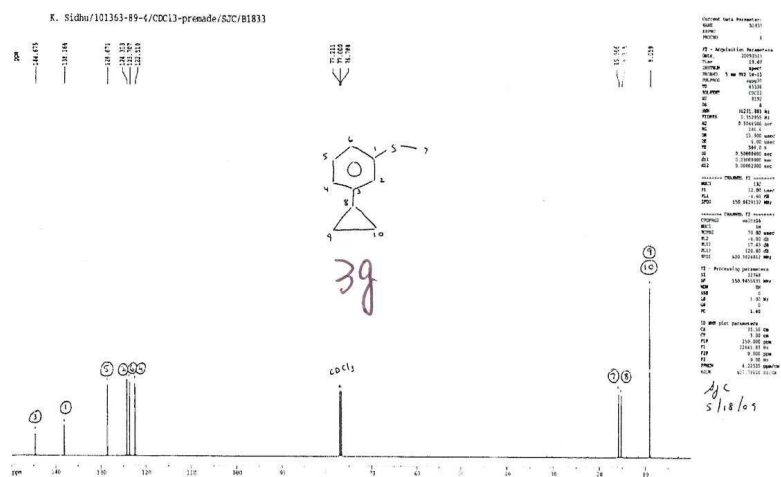

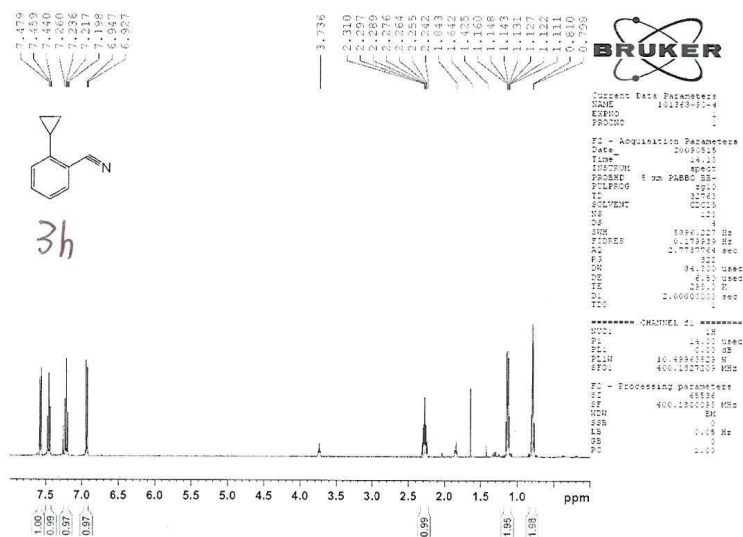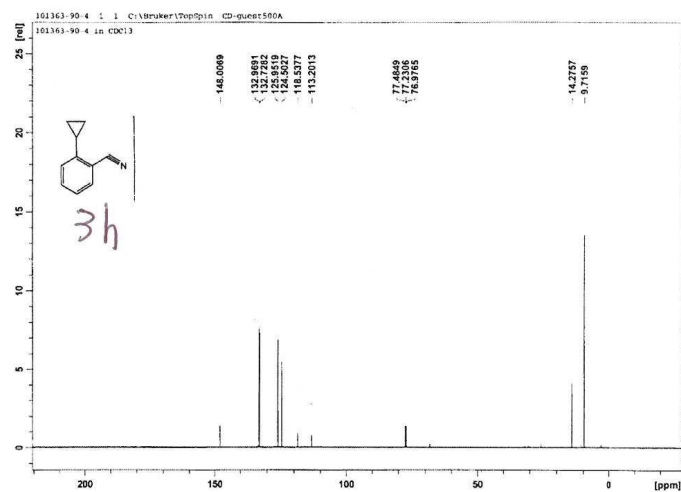

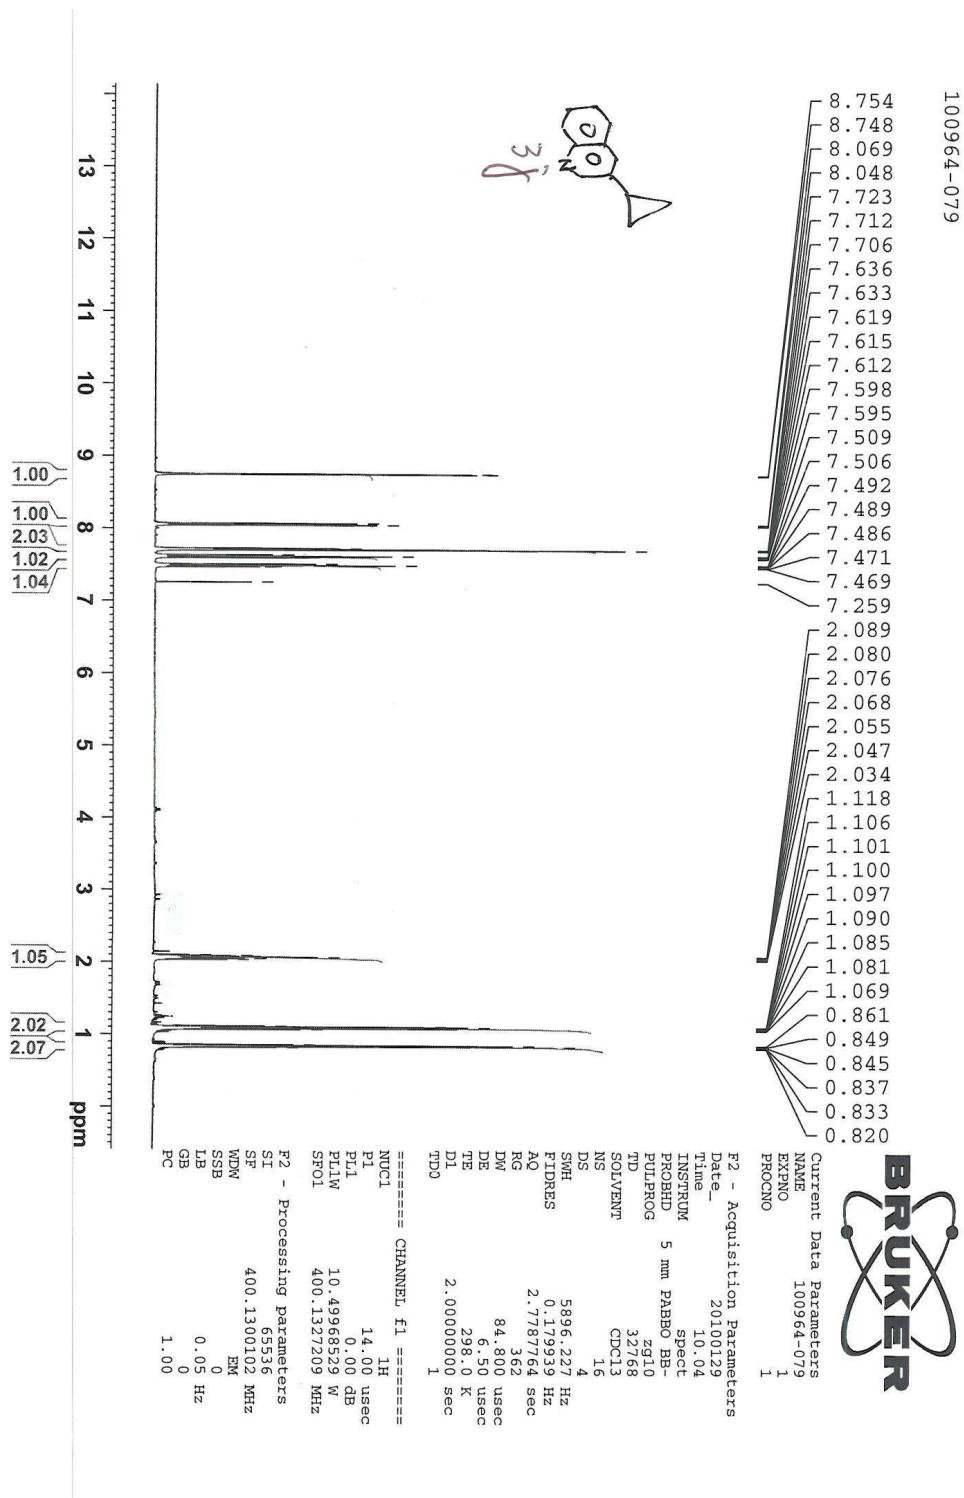

100964-079

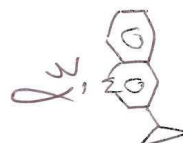

150.63  
146.62  
136.72  
130.93  
129.07  
128.36  
128.11  
127.17  
126.64

13.37  
9.17

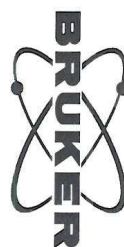

Current Data Parameters  
NAME 100964-079  
EXPNO 2  
PROCNO 1

## F2 - Acquisition Parameters

Date\_ 20100129  
Time 19.51  
INSTRUM spect  
PROBHD 5 mm PABBO BB-  
PULPROG zgpg  
TD 32768  
SOLVENT CDCl3  
NS 1024  
DS 4  
SWH 24038.461 Hz  
FIDRES 0.733596 Hz  
AQ 0.6816244 sec  
RG 32800  
DM 20.800 usec  
DE 6.50 usec  
TE 298.0 K  
D1 2.0000000 sec  
D11 0.0300000 sec  
TD0 1

## ===== CHANNEL f1 =====

NUC1 13C  
P1 9.75 usec  
PL1 -1.00 dB  
PL1W 43.00697708 W  
SFO1 100.6243395 MHz

## ===== CHANNEL f2 =====

CPDPRG2 waltz16  
NUC2 1H  
ROD2 80.00 usec  
P2 0.00 dB  
PL2 15.14 dB  
PL2W 15.14 dB  
PL2W 10.4994523 W  
PL1W 0.32149643 W  
SFO2 400.1316003 MHz

## F2 - Processing parameters

SI 65536  
SF 100.6127690 MHz  
WDW EM  
SSB 0  
LB 1.00 Hz  
GB 0  
PC 1.40

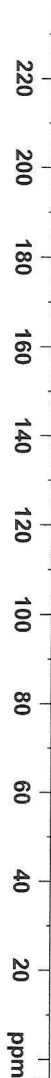

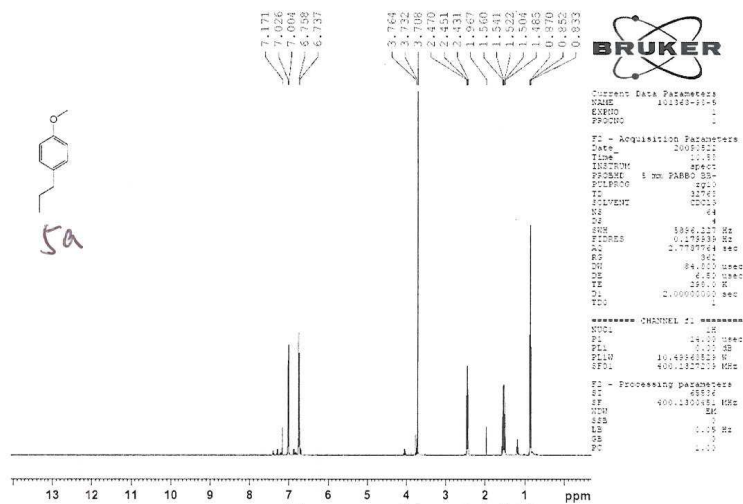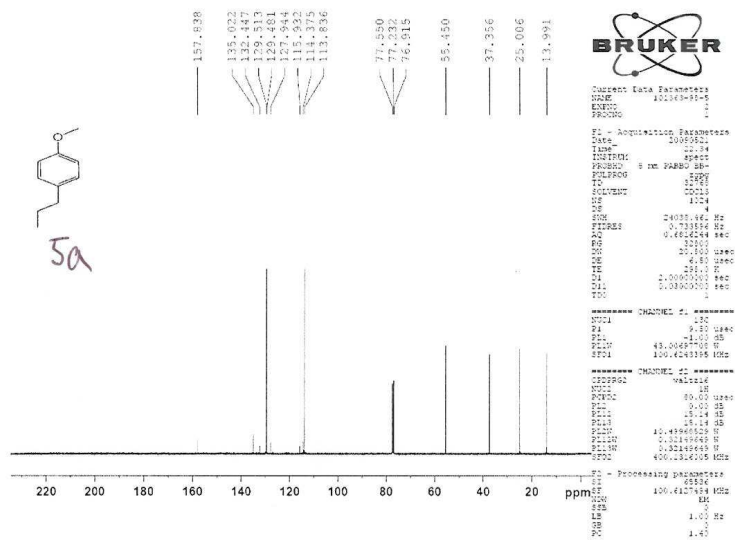

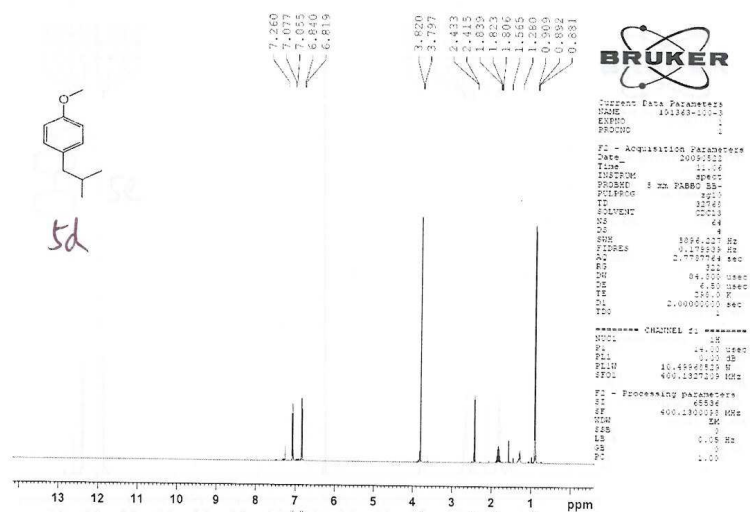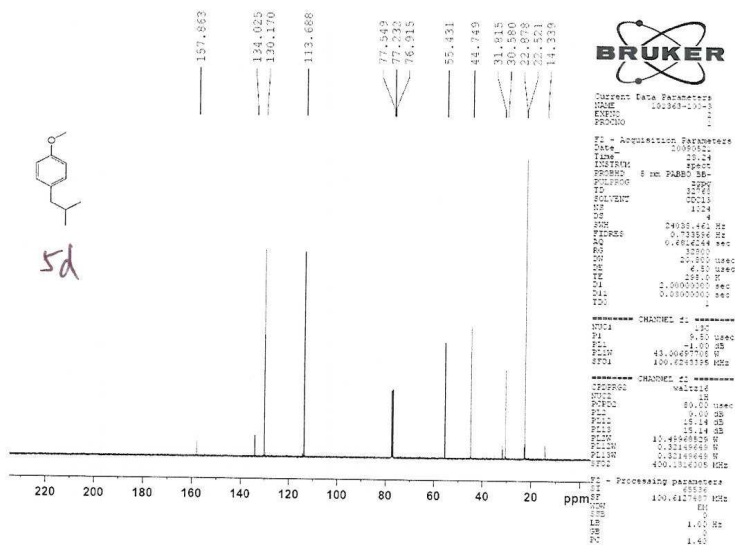





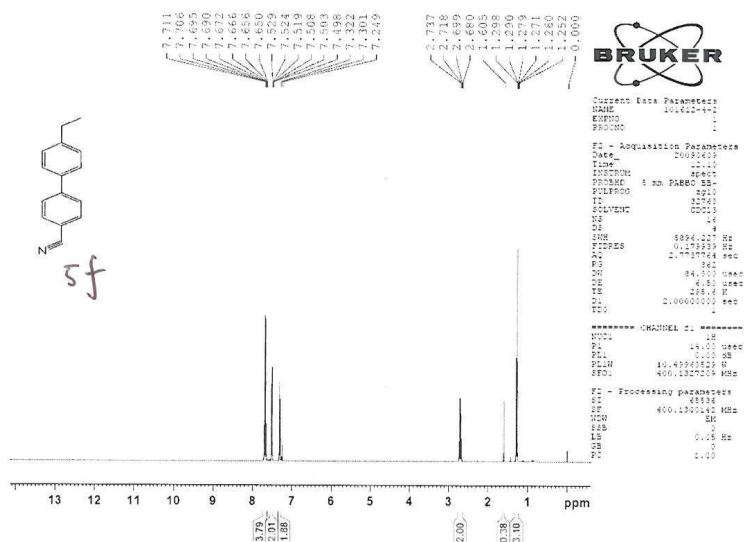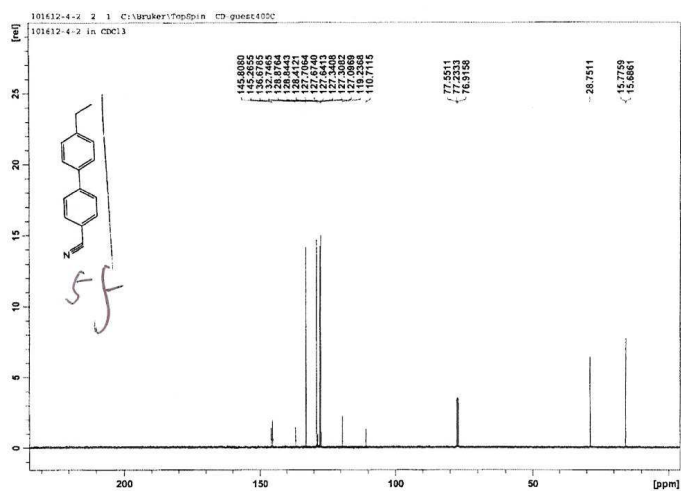

Supplement: Supplementary file 1 [file 4401448]
